# Supplementary figures and images for: Inositol phosphorylceramide synthase null Leishmania are viable and virulent in animal infections where salvage of host sphingomyelin predominates
Source: PubMed Central journal article supplement — J Biol Chem. 2022 Sep 23;298(11):102522. doi: 10.1016/j.jbc.2022.102522 (PMC9637897; doi:10.1016/j.jbc.2022.102522), 2022-09-23

Figure S6. Total spectra, negative ion mode

**Amastigotes**

**Infected Mouse Tissue**

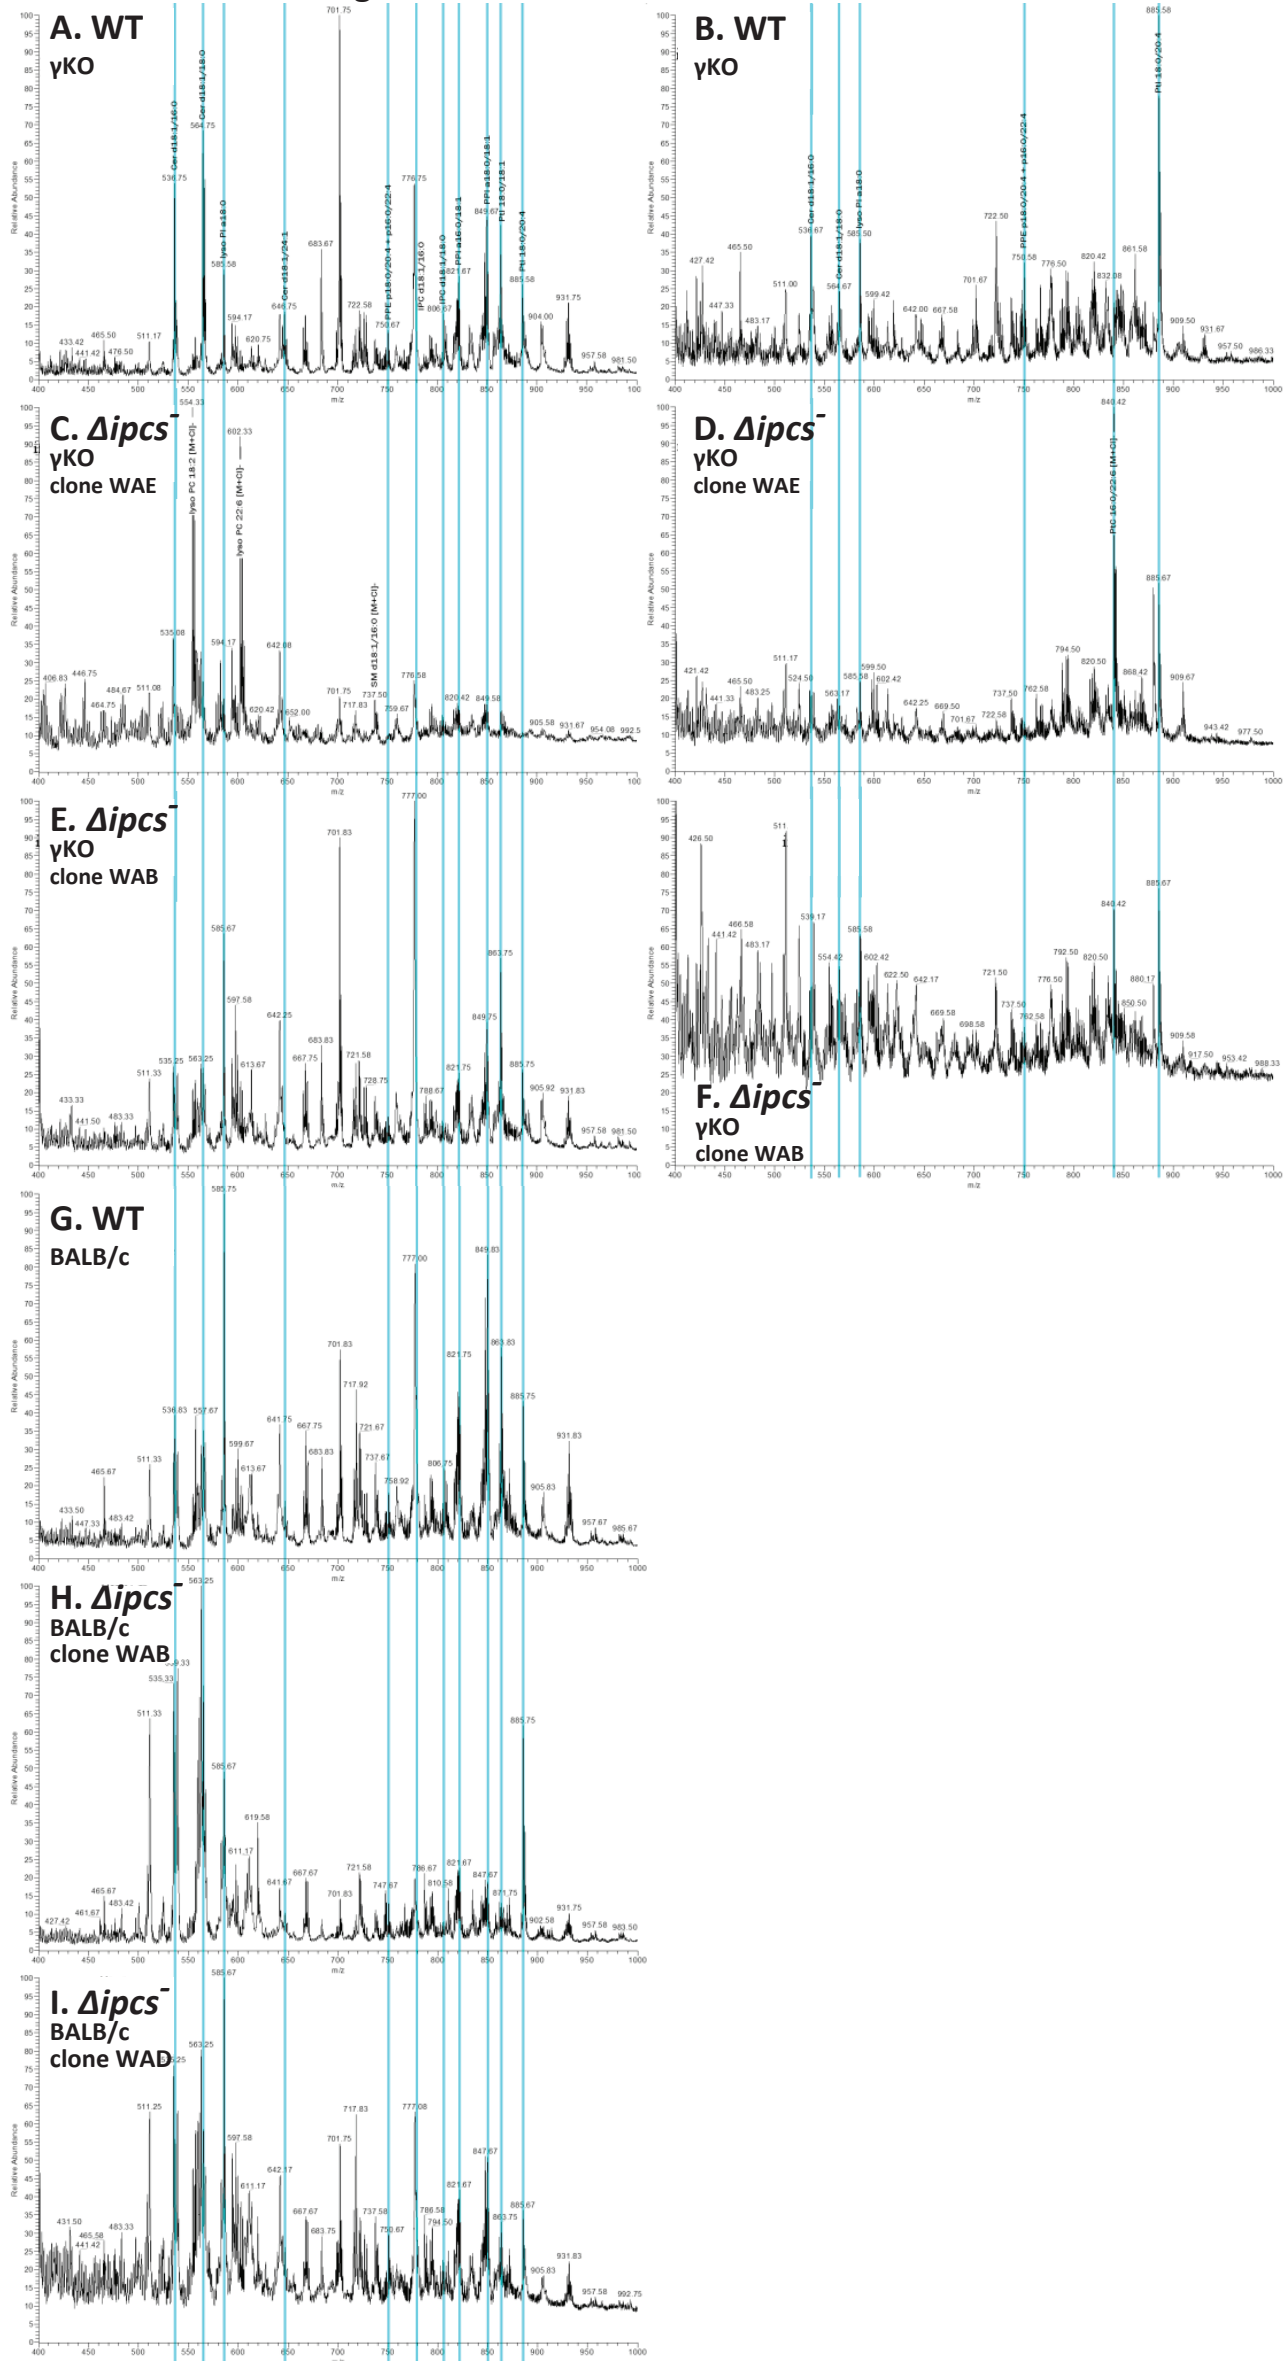

Supplement: mmc2.pdf [file mmc2.pdf]

Figure S7. Total spectra, -241 negative precursor scan

**Amastigotes**

**Infected Mouse Tissue**

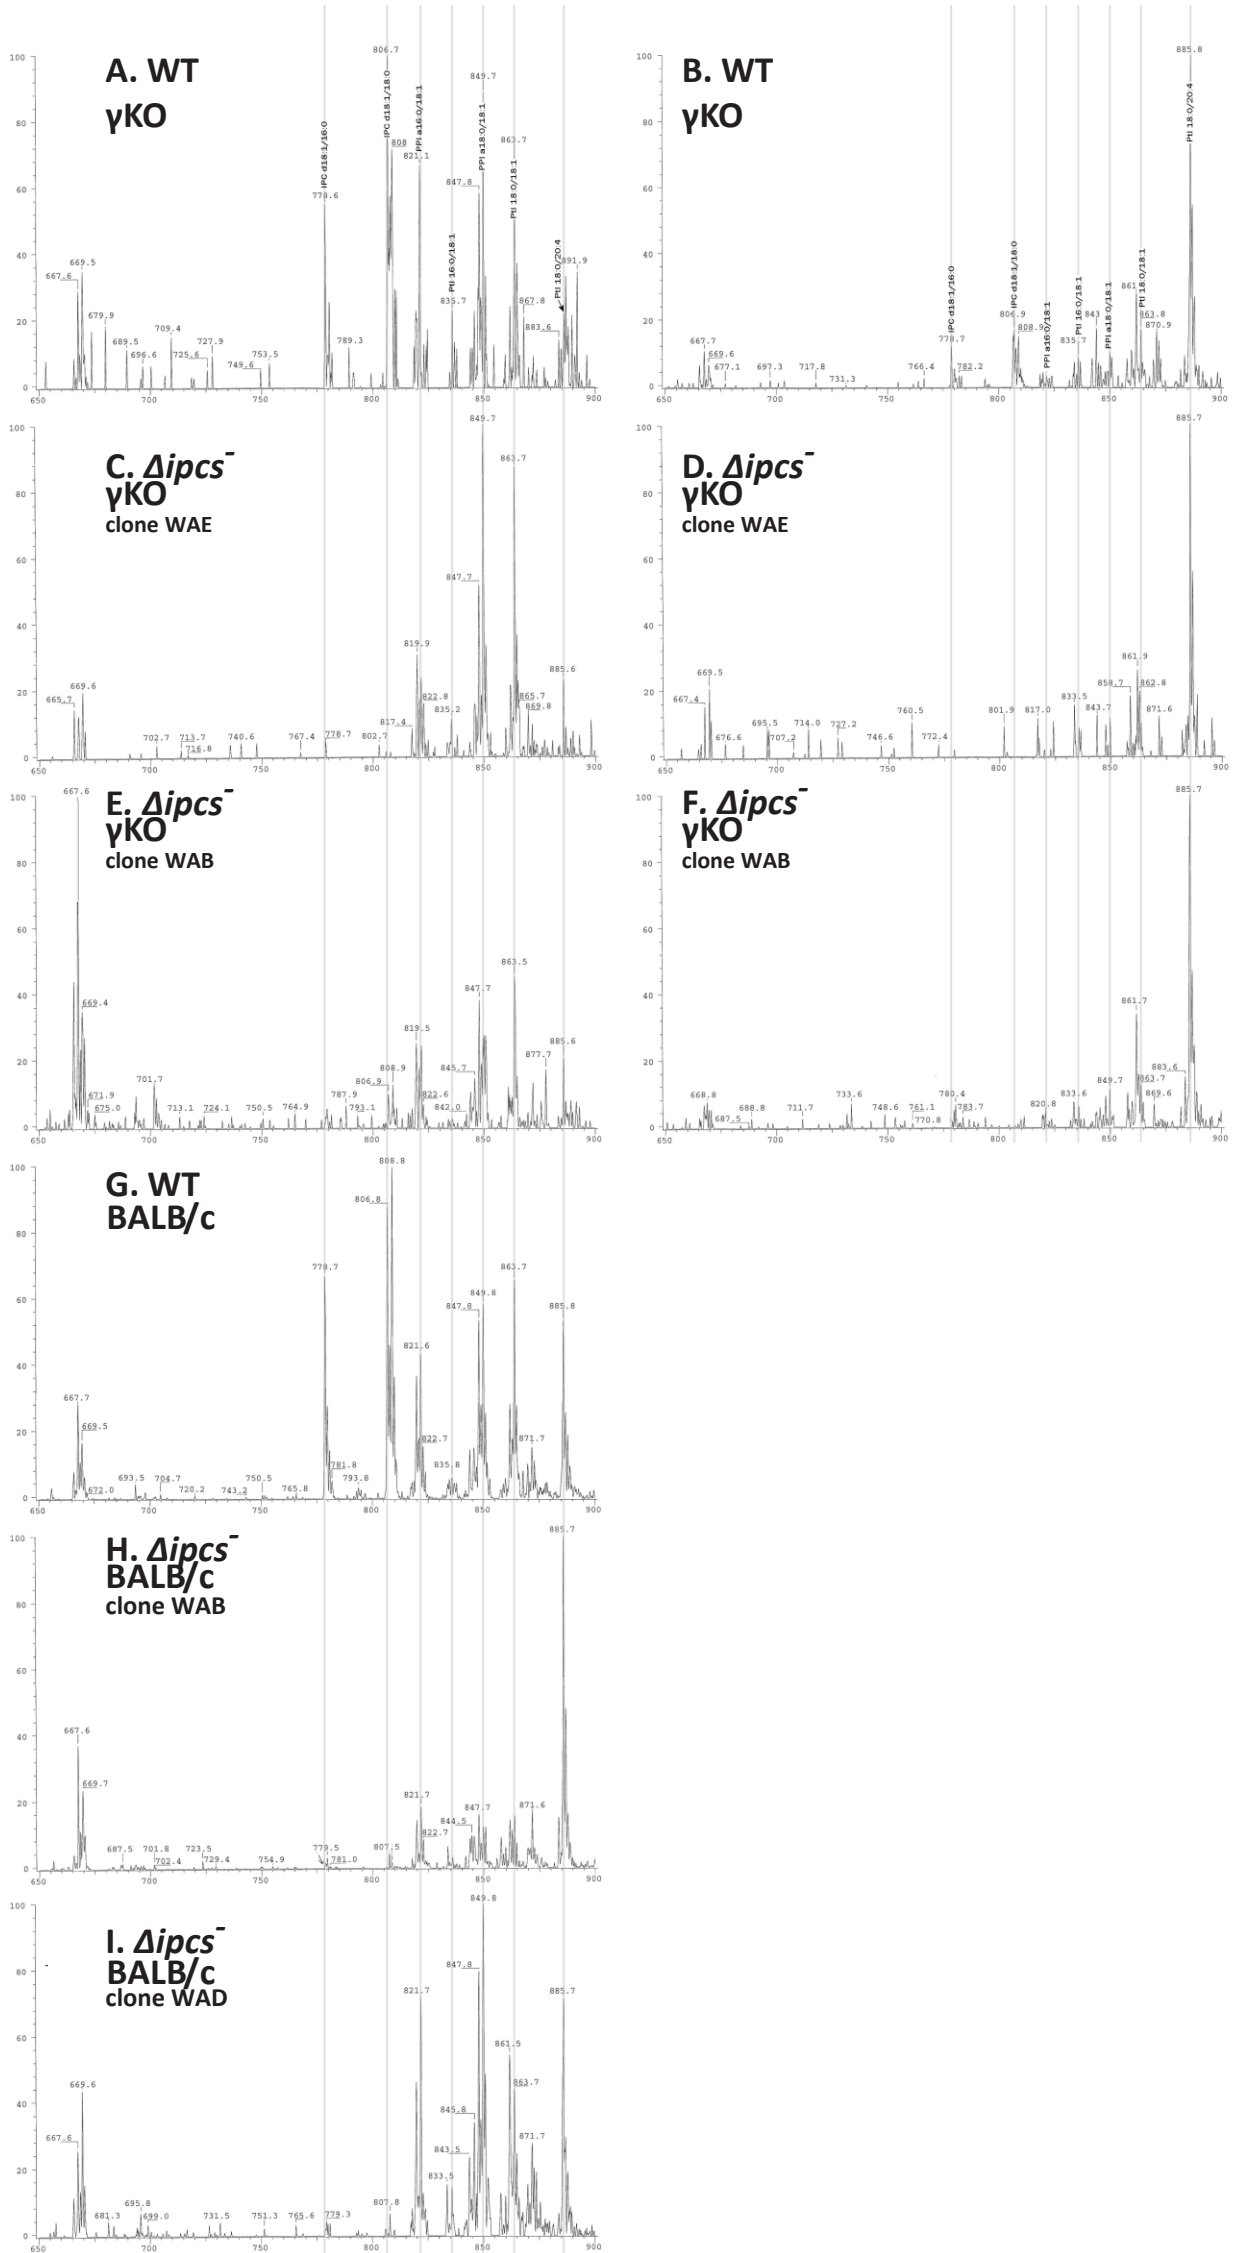

Supplement: mmc3.pdf [file mmc3.pdf]

Figure S8. Total spectra, positive ion scan

**Amastigotes**

**Infected Mouse Tissue**

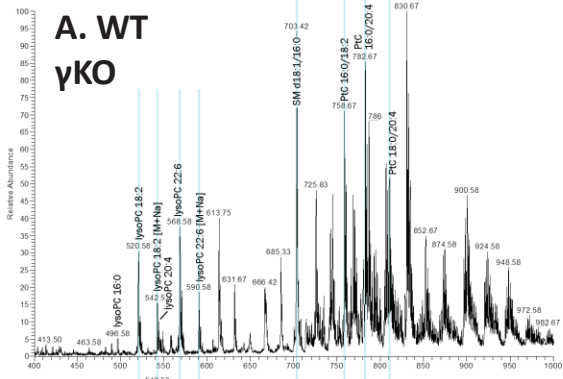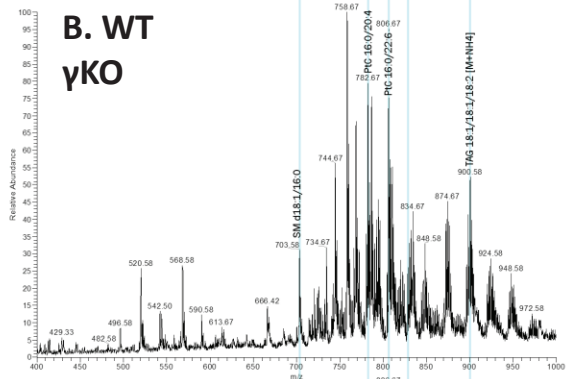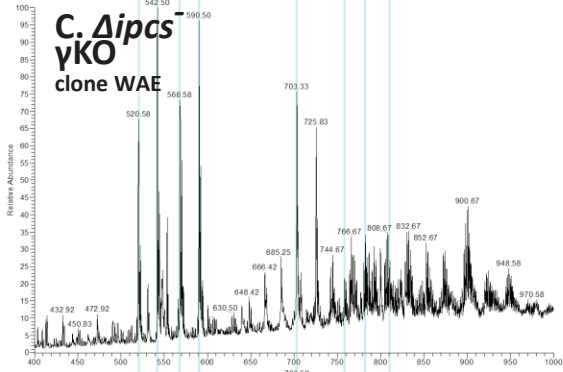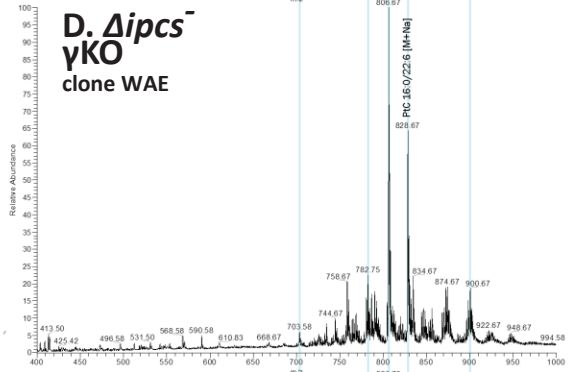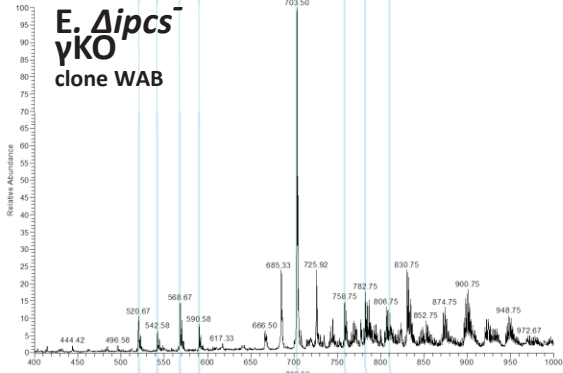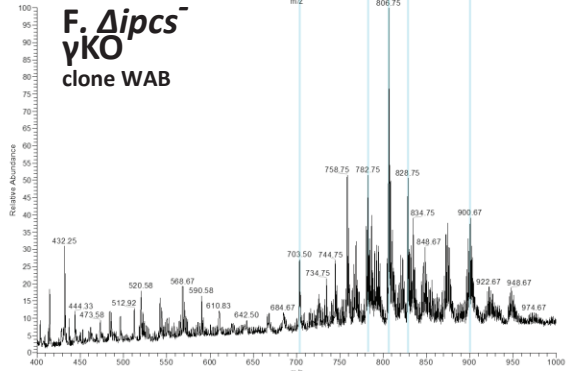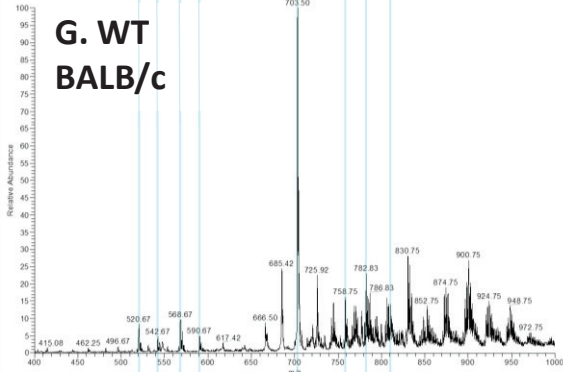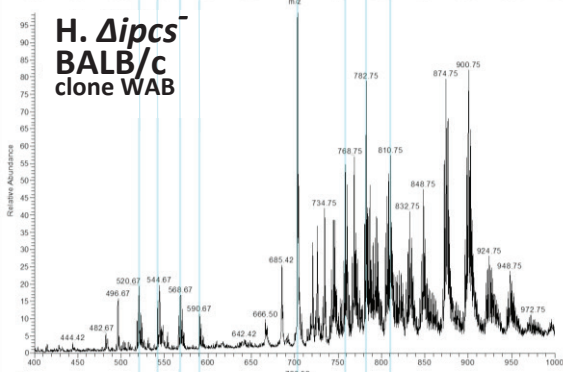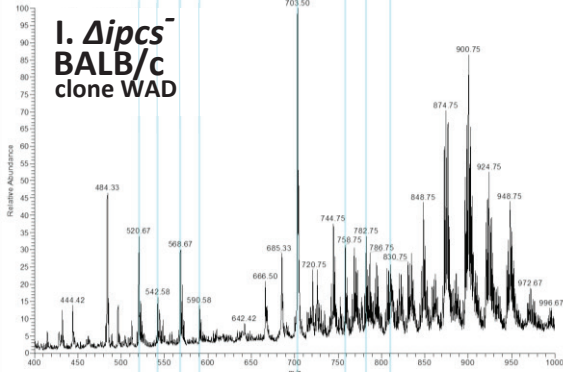

Supplement: mmc4.pdf [file mmc4.pdf]
